# Supplementary material
Source: publisher figshare collection journal article supplement (https://acs.figshare.com/ndownloader/files/3887473)
Supplement: Supplementary file 2 [file 3887473]

## Monodentate ( $\kappa^1$ )

(a)

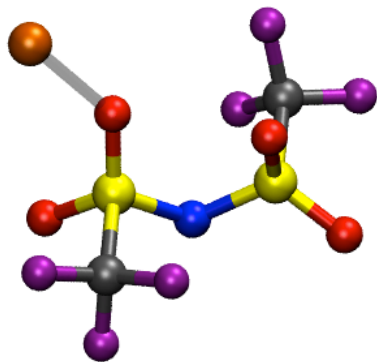

$$r_{\text{Li}^+-\text{O}} = 2.00 \text{ \AA}$$

(b)

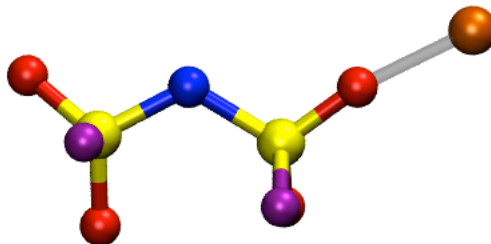

$$r_{\text{Li}^+-\text{O}} = 2.03 \text{ \AA}$$

(c)

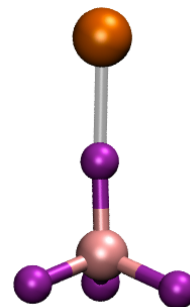

$$r_{\text{Li}^+-\text{F}} = 1.91 \text{ \AA}$$

## Bidentate ( $\kappa^2$ )

(d)

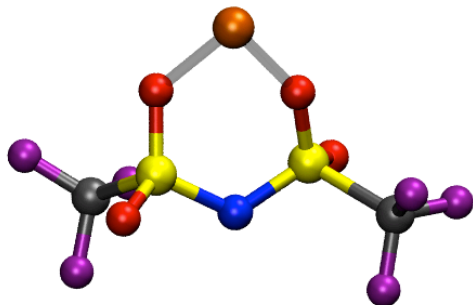

$$r_{\text{Li}^+-\text{O}} = 2.10 \text{ \AA}$$

(e)

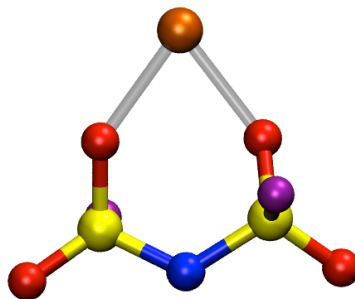

$$r_{\text{Li}^+-\text{O}} = 2.21 \text{ \AA}$$

(f)

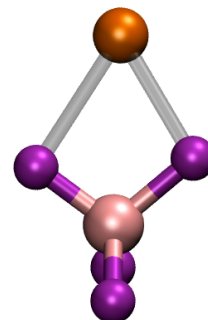

$$r_{\text{Li}^+-\text{F}} = 2.12 \text{ \AA}$$
