# Supplementary material
Source: publisher figshare collection journal article supplement (https://acs.figshare.com/ndownloader/files/3887473)
Supplement: Supplementary file 3 [file 3887473]

Archive with 20 entries (17 files):
- bulk.il.supp/
- bulk.il.supp/.DS_Store
- __MACOSX/
- __MACOSX/bulk.il.supp/
- __MACOSX/bulk.il.supp/._.DS_Store
- bulk.il.supp/bulk.il.supp.bib
- __MACOSX/bulk.il.supp/._bulk.il.supp.bib
- bulk.il.supp/bulk.il.supp.tex
- __MACOSX/bulk.il.supp/._bulk.il.supp.tex
- bulk.il.supp/exp_fig1.pdf
- __MACOSX/bulk.il.supp/._exp_fig1.pdf
- bulk.il.supp/exp_fig3.pdf
- __MACOSX/bulk.il.supp/._exp_fig3.pdf
- bulk.il.supp/fig1.pdf
- bulk.il.supp/fig2.pdf
- bulk.il.supp/fig3.pdf
- bulk.il.supp/fig4.pdf
- bulk.il.supp/fig5.pdf
- bulk.il.supp/fig8.pdf
- __MACOSX/bulk.il.supp/._fig8.pdf
