# Supplementary material
Source: publisher figshare collection journal article supplement (https://acs.figshare.com/ndownloader/files/3887473)
Supplement: Supplementary file 3 [file 3887473 › bulk.il.supp/bulk.il.supp.bib]

%%%%%
%Glenn Experimental papers
%%%%%

@ARTICLE{supp_exp1,
  author = {Wu, T.-Y. and Kuo, Z.-Y. and Jow, J.-J. and Kuo, C.-W. and Tsai, C.-J. and Chen, P.-R. and Chen, H.-R.},
  journal = {Int. J. Electrochem. Sci.},
  year = {2012},
  volume = {7},
  pages = {2047--2064}
}

@ARTICLE{supp_exp2,
  author = {Vila, J. and Franjo, C. and Pico, J. M. and Varela, L. M. and Cabeza, O.},
  journal = {Port. Electrochim. Acta},
  year = {2006},
  volume = {51},
  pages = {5567--5580}
}

@ARTICLE{supp_exp3,
  author = {Gali\'{n}ski, M. and Lewandowski, A. and St\c{e}pniak, I. },
  journal = {Electrochim. Acta},
  year = {2006},
  volume = {51},
  pages = {5567--5580}
}
