# Supplementary material
Source: publisher figshare collection journal article supplement (https://acs.figshare.com/ndownloader/files/3887473)
Supplement: Supplementary file 3 [file 3887473 › bulk.il.supp/bulk.il.supp.tex]

\documentclass[11pt,oneside]{amsart}
\usepackage{geometry}                % See geometry.pdf to learn the layout options. There are lots.
\geometry{letterpaper}                   % ... or a4paper or a5paper or ... 
%\geometry{landscape}                % Activate for for rotated page geometry
%\usepackage[parfill]{parskip}    % Activate to begin paragraphs with an empty line rather than an indent
\usepackage{graphicx}
\usepackage{amssymb}
\usepackage{epstopdf}
\usepackage[section]{placeins}

%\DeclareGraphicsRule{.tif}{png}{.png}{`convert #1 `dirname #1`/`basename #1 .tif`.png}


\makeatletter 
\renewcommand{\thefigure}{S\@arabic\c@figure}
\makeatother

\makeatletter 
\renewcommand{\thetable}{S\@arabic\c@table}
\makeatother

\title{Supplementary Material}

\begin{document}
\maketitle
\tableofcontents


\section{Structural Analysis}

\begin{figure}[!ht]
\includegraphics[width=9cm]{fig1.pdf}% Here is how to import EPS art
\caption{\label{fig1} Distribution of the C-S--S-C dihedral and the F-S--S-F dihedral in [TFSI]$^-$ and [FSI]$^-$, respectively, at $T =$ 298 K.  Values of $\phi$ close to 180$^{\circ}$ represent trans conformations, while smaller values represent cis conformations.}
\end{figure}

\begin{figure}[!ht]
\includegraphics[width=14cm]{fig2.pdf}% Here is how to import EPS art
\caption{\label{fig2}  Depiction of monodentate (a-c) and bidentate (d-f) binding states for Li[TFSI], Li[FSI], and Li[BF$_4$].  Average bond distances at $T =$ 298 K are included.}
\end{figure}

\begin{figure}[!ht]
\includegraphics[width=9cm]{fig3.pdf}% Here is how to import EPS art
\caption{\label{fig3} Most likely Li$^+$-anion coordination shells found in (a) [pyr14][TFSI], (b) [pyr13][FSI], and (c) [EMIM][BF$_4$] for a $T$ range 298 K to 393 K.  The values are averaged over simulations at x$_{Li^+} =$ 0.05, and the shells are defined by the number of monodentate ($\kappa^1$) and bidentate ($\kappa^2$) anions in the shell.}
\end{figure}

\begin{figure}[!ht]
\includegraphics[width=9cm]{fig4.pdf}% Here is how to import EPS art
\caption{\label{fig4} Distribution of cis and trans rotamers as a function of Li-salt mole fraction, x$_{\text{Li}^+}$, for anions not bonded with Li$^+$ (dashed lines) and all anions in the system (solid lines).}
\end{figure}

\begin{figure}[!ht]
\includegraphics[width=9cm]{fig5.pdf}% Here is how to import EPS art
\caption{\label{fig5} Distribution of monodentate bonds to Li$^+$ as a function of Li-salt mole fraction, x$_{\text{Li}^+}$, for Li ions not associated with a cluster structures (dashed lines) and all Li ions in the system (solid lines).}
\end{figure}

\section{Computational and Experimental Thermodynamics}

Measurements for neat [EMIM][BF$_4$] exhibit a significant hysteresis in conductivity, below -15$^o$C (see Fig.~\ref{exp_fig3}).
Similar hysteresis has been reported by J. Vila et al. for a number of [EMIM]-based ionic liquids.~\cite{supp_exp2}
The observed drop in conductivity occurs well above the solidification temperature tabulated by Galinski for [EMIM][BF$_4$].~\cite{supp_exp3}
Ionic liquids based on [pyr14][TFSI] were not studied below room temperature in this work.

\begin{figure}[!ht]
\includegraphics[width=9cm]{exp_fig1.pdf}% Here is how to import EPS art
\caption{\label{exp_fig1} Conductivity fixture.}
\end{figure}


\begin{figure}[!ht]
\includegraphics[width=9cm]{exp_fig3.pdf}% Here is how to import EPS art
\caption{\label{exp_fig3} Conductivity of neat [EMIM][BF$_4$].}
\end{figure}

\begin{figure}[!ht]
\includegraphics[width=9cm]{fig8.pdf}% Here is how to import EPS art
\caption{\label{fig8} Deviation of computed Li$^+$ MSD as a function of initial state over the course of  a 191 ns simulation at $T =$ 298 K.  The difference between D$^{\text{Li}^+}$ taken from the initial trajectory (black solid line) and the final trajectory (green dahed-dotted line) is a factor $\sim2$. }
\end{figure}

\begin{table}[!ht]
\caption{\label{t1} Density and diffusion coefficient of [pyr14][TFSI] and [EMIM][BF$_4$] at $T =$ 298 K for both neat samples and those having 0.5 m Li-salt doping.   }
\begin{center}
\begin{tabular}{lcccc}
\noalign{\vskip 5pt}
& $\rho$ (g/cm$^3$) & D$^{+}$ (m$^2$/s) & D$^{-}$ (m$^2$/s) & D$^{\text{Li}}$ (m$^2$/s) \\
&\multispan 1 \hrulefill & \multispan 1 \hrulefill & \multispan 1 \hrulefill & \multispan 1 \hrulefill\\
\noalign{\vskip 5pt}
[pyr14][TFSI] (neat)& - & 0.1338E-10 & 0.1029E-10 & - \\

[pyr14][TFSI] (0.5 m Li-salt) & 1.44 & 0.0473E-10 & 0.0270E-10 & 0.0248E-10 \\

[EMIM][BF$_4$] (neat) & - & 0.3339E-10 & - & - \\

[EMIM][BF$_4$] (0.5 m Li-salt)& 1.31 & 0.2329E-10 & - & 0.0765E-10 \\

%[pyr13][FSI] (neat) &  &  &  &  \\

%[pyr13][FSI] (0.5 m Li-salt) &  &  &  &  \\
\noalign{\vskip 10pt}
\end{tabular}
\end{center}
\end{table}
\eject


\begin{table}
\caption{\label{t2} $T$ dependence of the ionic conductivity of [pyr14][TFSI] in both the neat form and that having 0.5 m Li-salt doping.}
\begin{center}
\begin{tabular}{ccc}
\noalign{\vskip 5pt}
&\multispan 2 \hfil $\lambda$ (mS/cm) \hfil \\
&\multispan 2 \hrulefill \\
\noalign{\vskip 5pt}
%  & \multispan 3 \hfil $\lambda$ (mS/cm) \hfil \\
%\noalign{\vskip -10pt}
% & \multispan 3 \hrulefill  \\
\multispan 1 \hfil & [pyr14][TFSI] & [pyr14][TFSI] \\
\noalign{\vskip 3pt}
T (K) & (neat) & (0.5 m Li-salt) \\
\noalign{\vskip 5pt}
\multispan 1 \hrulefill & \multispan 1  \hrulefill & \multispan 1 \hrulefill  \\
%\noalign{\vskip 10pt}
%\multispan 7 \hrulefill \\
%\noalign{\vskip 10pt}
%\multispan 2 \hfil small basis set \hfil \\
\noalign{\vskip 3pt}
293.0	& 	2.31  	& 	1.22	\\
313.0	& 	4.98  	&  	2.85	\\
333.0 	& 	8.90		&  	5.55 	\\
353.0 	& 	13.8 		&  	8.54	\\
	\noalign{\vskip 10pt}
\end{tabular}
\end{center}
\end{table}
\eject


\begin{table}
\caption{\label{t3} $T$ dependence of the ionic conductivity of [EMIM][BF$_4$] in both the neat form and that having 0.5 m Li-salt doping.}
\begin{center}
\begin{tabular}{crr}
\noalign{\vskip 5pt}
&\multispan 2 \hfil $\lambda$ (mS/cm) \hfil \\
&\multispan 2 \hrulefill \\
\noalign{\vskip 5pt}
%  & \multispan 3 \hfil $\lambda$ (mS/cm) \hfil \\
%\noalign{\vskip -10pt}
% & \multispan 3 \hrulefill  \\
\multispan 1 \hfil & [EMIM][BF$_4$] & [EMIM][BF$_4$] \\
\noalign{\vskip 3pt}
T (K) & (neat) & (0.5 m Li-salt) \\
\noalign{\vskip 5pt}
\multispan 1 \hrulefill & \multispan 1  \hrulefill & \multispan 1 \hrulefill  \\
%\noalign{\vskip 10pt}
%\multispan 7 \hrulefill \\
%\noalign{\vskip 10pt}
%\multispan 2 \hfil small basis set \hfil \\
\noalign{\vskip 3pt}
352.1	& 	63.6 	&	43.6\\
334.4	& 	47.3  &	31.1\\
332.2 	& 	43.4	 &	29.7\\
314.5 	& 	29.5 	&	19.3\\
313.5	&	28.0	&	18.4\\
297.6	&	17.6	&	11.0\\
295.0	&	16.4	&	9.7\\
294.1	&	15.5	&	9.6\\
275.5	&	7.38	&	4.0\\
	\noalign{\vskip 10pt}
\end{tabular}
\end{center}
\end{table}
\eject

\begin{table}
\caption{\label{t3} $T$ dependence of the ionic conductivity of neat [pyr13][FSI].}
\begin{center}
\begin{tabular}{cr}
\noalign{\vskip 5pt}
%  & \multispan 3 \hfil $\lambda$ (mS/cm) \hfil \\
%\noalign{\vskip -10pt}
% & \multispan 3 \hrulefill  \\
T & $\lambda$ \\
\noalign{\vskip 3pt}
 (K) & (mS/cm)  \\
\noalign{\vskip 5pt}
\multispan 1 \hrulefill & \multispan 1  \hrulefill   \\
%\noalign{\vskip 10pt}
%\multispan 7 \hrulefill \\
%\noalign{\vskip 10pt}
%\multispan 2 \hfil small basis set \hfil \\
\noalign{\vskip 3pt}
253.7 	&	1.4	\\
265.0	&	2.6 \\
274.6	&	3.9 \\
277.3	&	4.4 \\
295.1	&	8.0 \\
295.2	&	7.9 \\
296.5	& 	8.3 \\  	
313.5	& 	13.1 \\  	
318.1 	&	14.6 \\
333.1 	& 	20.0 \\	
335.1	&	20.1 \\
353.1 	& 	 28.2  	\\	
	\noalign{\vskip 10pt}
\end{tabular}
\end{center}
\end{table}
\eject

\begin{table}
\caption{\label{t4} $T$ dependence of the ionic conductivity of a 0.5 m solution of Li[FSI] in [pyr13][FSI].}
\begin{center}
\begin{tabular}{cr}
\noalign{\vskip 5pt}
%  & \multispan 3 \hfil $\lambda$ (mS/cm) \hfil \\
%\noalign{\vskip -10pt}
% & \multispan 3 \hrulefill  \\
T & $\lambda$ \\
\noalign{\vskip 3pt}
 (K) & (mS/cm)  \\
\noalign{\vskip 5pt}
\multispan 1 \hrulefill & \multispan 1  \hrulefill   \\
%\noalign{\vskip 10pt}
%\multispan 7 \hrulefill \\
%\noalign{\vskip 10pt}
%\multispan 2 \hfil small basis set \hfil \\
\noalign{\vskip 3pt}
253.8	&	0.9 \\
255.3 	& 	1.0 \\
264.8 	& 	 1.7  	\\
275.0 	&	2.9 \\
284.1	&	4.2	\\
293.8	&	6.0	\\
294.5	& 	6.2 \\
294.8 	&	5.4	\\
307.3	&	8.6 \\
319.5	& 	12.7 \\  
333.5	&	17.0 \\
339.3	&	19.4 \\
343.0	&	20.7 \\
353.0	&	24.6 \\	
	\noalign{\vskip 10pt}
\end{tabular}
\end{center}
\end{table}
\eject

\bibliographystyle{unsrt}
\bibliography{bulk.il.supp}
\end{document}  
