# Supplementary material
Source: publisher figshare collection journal article supplement (https://acs.figshare.com/ndownloader/files/3887473)

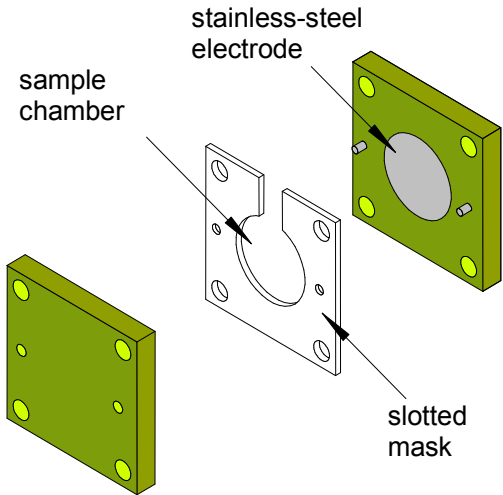

Supplement: Supplementary file 3 [file 3887473 › bulk.il.supp/exp_fig1.pdf]

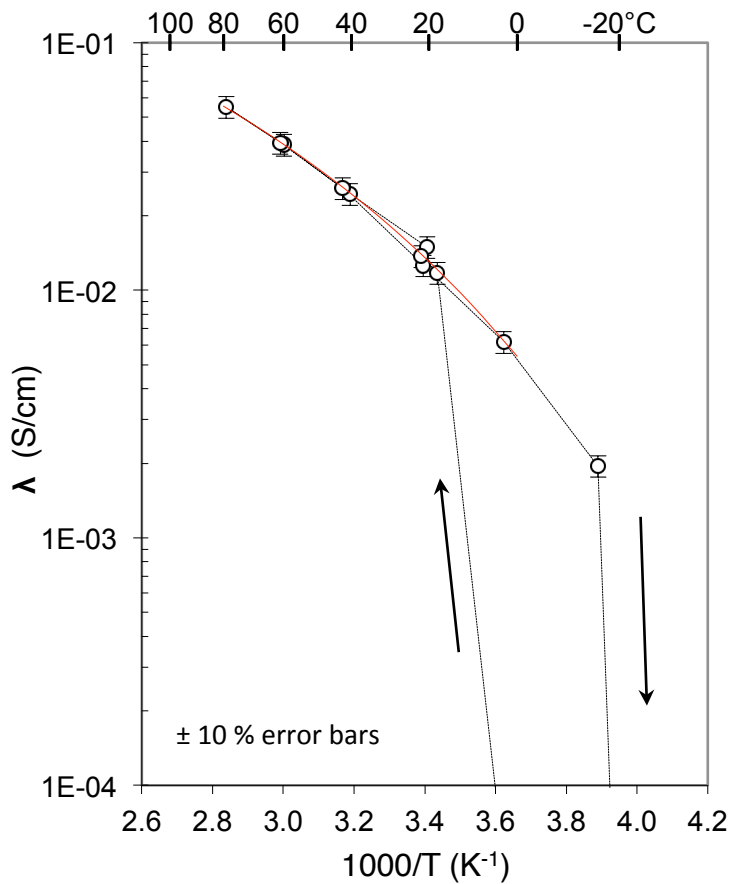

Supplement: Supplementary file 3 [file 3887473 › bulk.il.supp/exp_fig3.pdf]

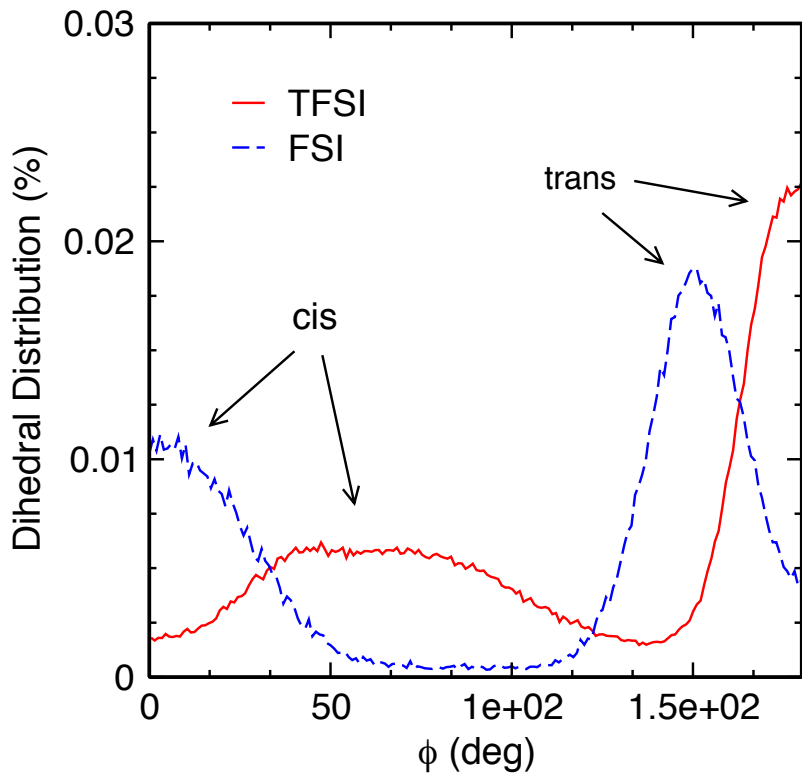

Supplement: Supplementary file 3 [file 3887473 › bulk.il.supp/fig1.pdf]

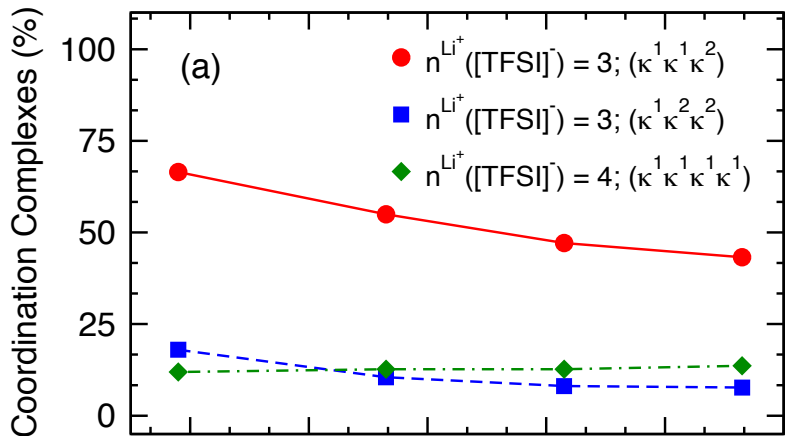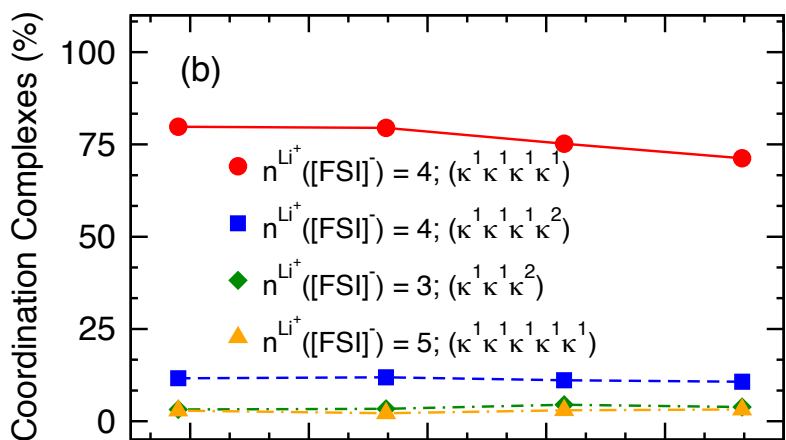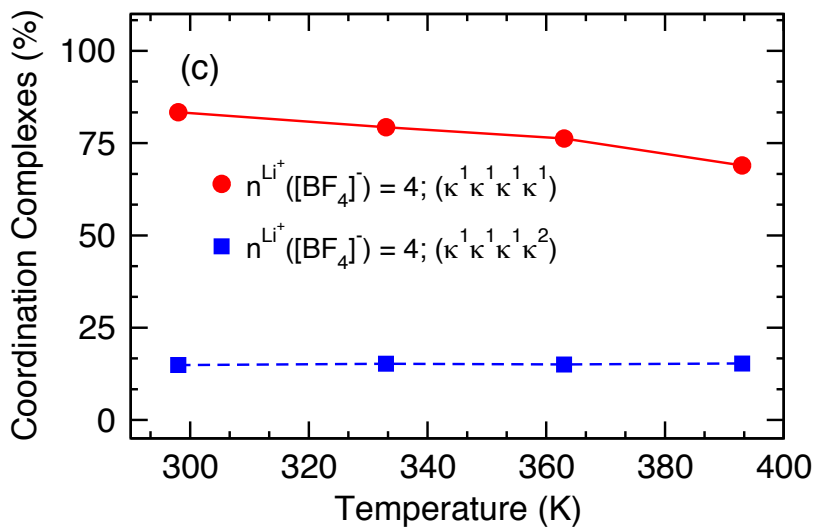

Supplement: Supplementary file 3 [file 3887473 › bulk.il.supp/fig3.pdf]

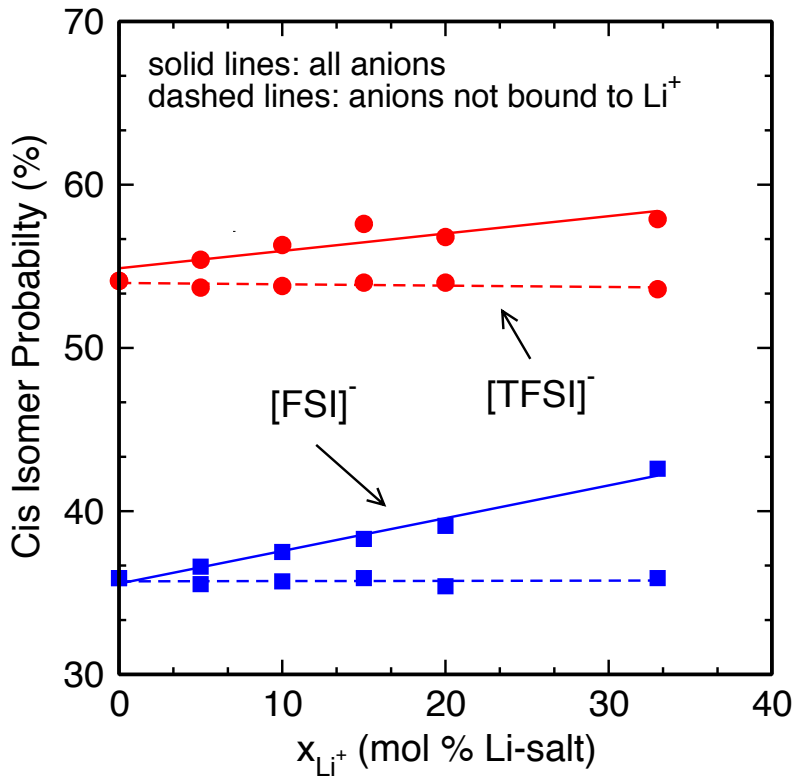

Supplement: Supplementary file 3 [file 3887473 › bulk.il.supp/fig4.pdf]

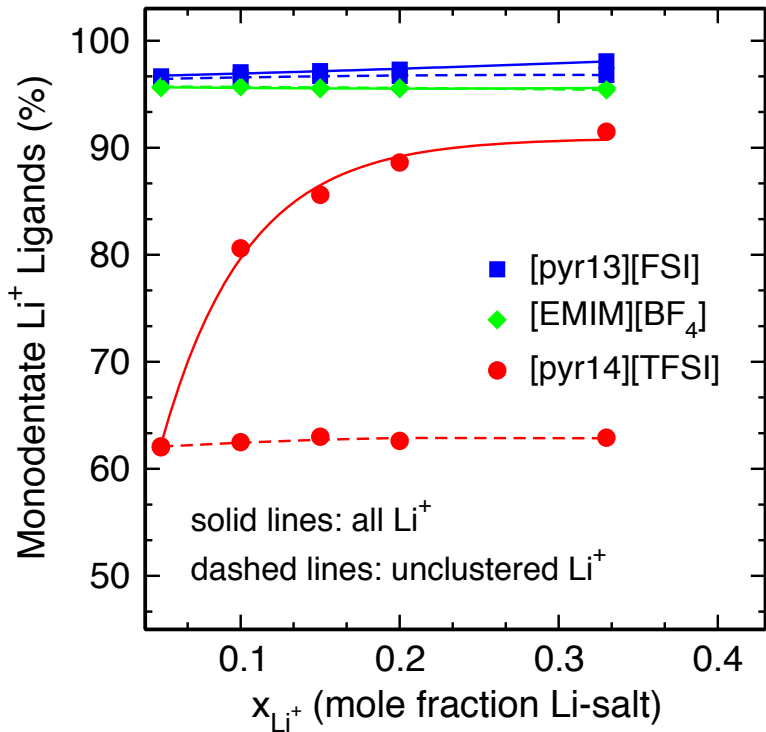

Supplement: Supplementary file 3 [file 3887473 › bulk.il.supp/fig5.pdf]

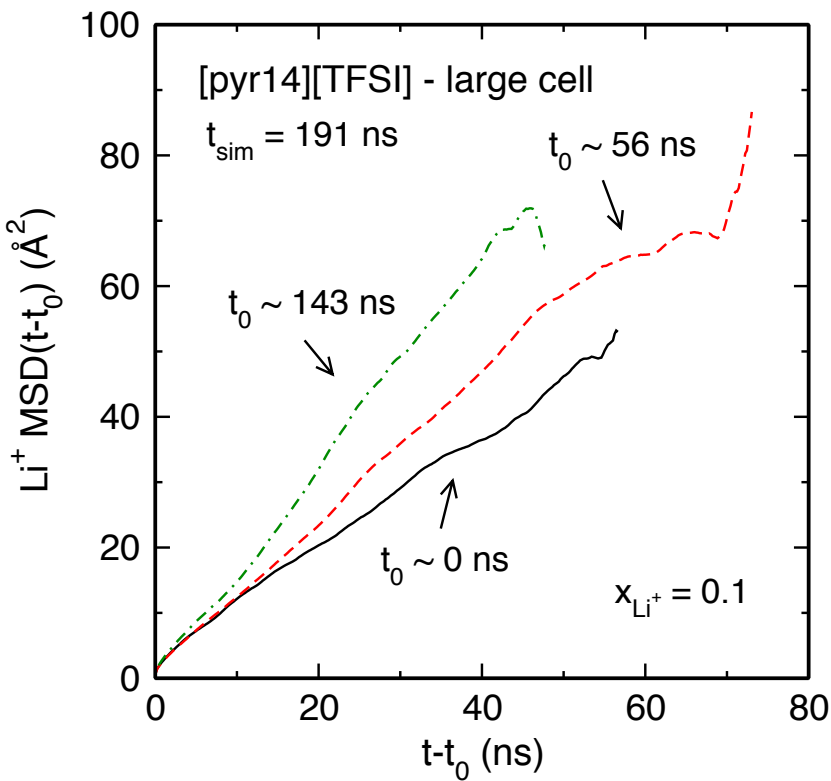

Supplement: Supplementary file 3 [file 3887473 › bulk.il.supp/fig8.pdf]
